# Supplementary material
Source: PubMed Central journal article supplement (PMC4022293)
Supplement: NIHMS74293-supplement-Supporting_materials.pdf [file NIHMS74293-supplement-Supporting_materials.pdf]

# Nanobiosensing Using Plasmonic Nanoprobes

## Supporting Online Material

### Predicted secondary structures of the BRCA1 MS probe

Predicted secondary structures of the BRCA1 MS nanoprobes were evaluated with the help of Zuker DNA folding program (<http://www.bioinfo.rpi.edu/applications/mfold/old/dna/form1.cgi>) which utilizes the free energy of formation of the stem to predict the melting temperature ( $T_m$ ).

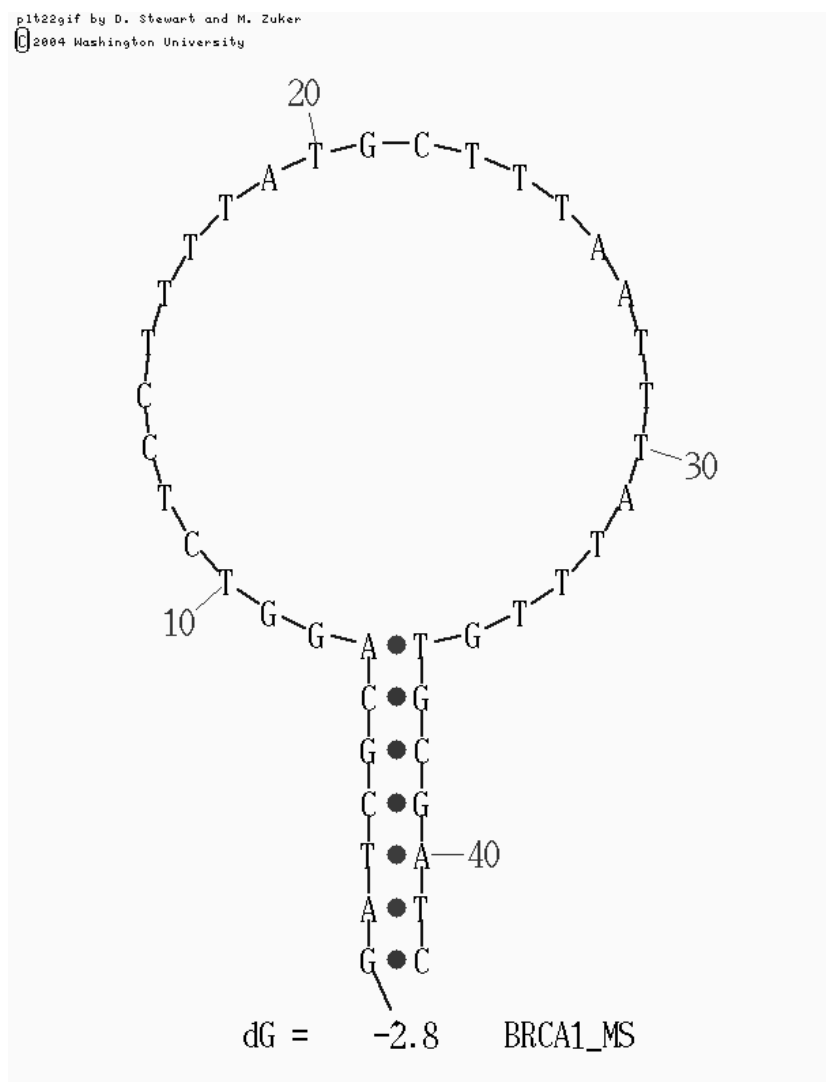

**Figure S1.** Computed generated structure from a 42-bp BRAC1 MS probe consisting of a complementary stem sequence (6-bp) and a loop sequence (30-bp) is shown in the figure below.

### DNA Target sequence

BRCA1: Homo sapiens breast and ovarian cancer susceptibility protein 1 gene (AY706911, 272 bp), exon 11 and partial cds. Detailed information is available from the National Center for Biotechnology Information (NCBI) data base.

**Table S1.** Partial DNA sequence for the breast cancer gene, BRAC1 used in this study.

| DNA Probe                              | Sequence(5' to 3')                                                                                                                 |
|----------------------------------------|------------------------------------------------------------------------------------------------------------------------------------|
| BRCA1 WT <sup>GCA</sup> DNA (N1-100th) | GAGCCACAGA TAATACAAGA GCGTCCCCTC <b>ACAAATAAAT</b><br><b>TAAAGCA*TAA AAGGAGACCT</b> ACATCAGGCC TTCATCCTGA<br>GGATTTTATC AAGAAAGCAG |
| BRCA1 MT <sup>GCG</sup> DNA(N1-100th)  | GAGCCACAGA TAATACAAGA GCGTCCCCTC <b>ACAAATAAAT</b><br><b>TAAAGCG*TAA AAGGAGACCT</b> ACATCAGGCC TTCATCCTGA<br>GGATTTTATC AAGAAAGCAG |
| BRAC1 MS (N31-60th)                    | <u>GATCGC</u> AGG TCT CCT TTT ATG CTT TAA TTT ATT TGT<br><u>GCGATC</u>                                                             |
| Non-complementary DNA                  | TAATCAGGTA GAGACGCGAT CGTGTAACAC GACTC ACAAT<br>AGAATCTGTG AATGCTCTCC CGGATATTAT TGTCTTCTTA<br>AAGGATCATC CGGATGCAAG               |

The bold letters indicate the gene probe sequence; Underlined bases represent the stem sequence of the DNA hairpin. \* A variation at site N47 on the BRCA1 gene that leads to Arginine 504/ Histidine missense mutation where A is replaced with G.
